# Supplementary material
Source: ML conference proceedings conference paper supplement (https://openreview.net/forum?id=BopG5dhH7L)
Supplement: supplementary_material [file attachment]

## Supplementary material

|     |                                                              |    |
|-----|--------------------------------------------------------------|----|
| 479 | A.1 Properties of LogDet subproblem . . . . .                | 13 |
| 480 | A.2 Regret bound analysis . . . . .                          | 14 |
| 481 | A.2.1 Regret bound decomposition . . . . .                   | 14 |
| 482 | A.2.2 Properties of tridiagonal preconditioner . . . . .     | 15 |
| 483 | A.2.3 Upperbounding Regret . . . . .                         | 16 |
| 484 | A.2.4 $\mathcal{O}(\sqrt{T})$ Regret . . . . .               | 19 |
| 485 | A.2.5 Non-convex guarantees . . . . .                        | 22 |
| 486 | A.3 Numerical stability . . . . .                            | 22 |
| 487 | A.3.1 Condition number analysis . . . . .                    | 23 |
| 488 | A.3.2 Degenerate $H_t$ . . . . .                             | 24 |
| 489 | A.3.3 Numerically Stable SONew proof . . . . .               | 25 |
| 490 | A.4 Additional Experiments, ablations, and details . . . . . | 25 |
| 491 | A.4.1 Ablations . . . . .                                    | 25 |
| 492 | A.4.2 Hyperparameter search space . . . . .                  | 26 |
| 493 | A.4.3 Additional Experiments . . . . .                       | 26 |
| 494 | A.4.4 Convex experiments . . . . .                           | 26 |

### 495 A.1 Properties of LogDet subproblem

496 *Proof of Theorem 3.2*

497 The optimality condition of (11) is  $P_{\mathcal{G}}(X^{-1}) = P_{\mathcal{G}}(H)$ ,  $X \in S_n^{++}(\mathcal{G})$ . Let  $Z = L^{-T}D^{-1}L^{-1}$ ,  
 498 then  $P_{\mathcal{G}}(Z) = H$

$$ZL = L^{-T}D^{-1} \implies ZLe_j = L^{-T}D^{-1}e_j$$

499 Let  $J_j = I_j \cup j$ , where  $I_j = \{j+1, \dots, j+b\}$  as defined in the theorem, then select  $J_j$  indices of  
 500 vectors on both sides of the second equality above and selecting the  $J_j$  indices :

$$\begin{bmatrix} Z_{jj} & Z_{jI_j} \\ Z_{I_j j} & Z_{J_j J_j} \end{bmatrix} \begin{bmatrix} 1 \\ L_{I_j} \end{bmatrix} = \begin{bmatrix} 1/d_{jj} \\ 0 \end{bmatrix} \quad (15)$$

501 Note that  $L^{-T}$  is an upper triangular matrix with ones in the diagonal hence  $J_j^{th}$  block of  $L^{-T}e_j$   
 502 will be  $[1, 0, 0, \dots]$ . Also, since  $P_{\mathcal{G}}(Z) = H$

$$\begin{bmatrix} Z_{jj} & Z_{jI_j} \\ Z_{I_j j} & Z_{J_j J_j} \end{bmatrix} = \begin{bmatrix} H_{jj} & H_{jI_j} \\ H_{I_j j} & H_{J_j J_j} \end{bmatrix}$$

503 Substituting this in the linear equation 15

$$\begin{aligned} & \begin{bmatrix} H_{jj} & H_{jI_j} \\ H_{I_j j} & H_{J_j J_j} \end{bmatrix} \begin{bmatrix} 1 \\ L_{I_j} \end{bmatrix} = \begin{bmatrix} 1/d_{jj} \\ 0 \end{bmatrix} \\ & \begin{bmatrix} H_{jj} & H_{jI_j} \\ H_{I_j j} & H_{J_j J_j} \end{bmatrix} \begin{bmatrix} d_{jj} \\ d_{jj} \cdot L_{I_j} \end{bmatrix} = \begin{bmatrix} 1 \\ 0 \end{bmatrix} \\ & H_{jj}d_{jj} + d_{jj}H_{I_j j}^T L_{I_j} = 1 \\ & H_{I_j j}d_{jj} + d_{jj}H_{I_j I_j} L_{I_j} = 0 \end{aligned}$$

504 The lemma follows from solving the above equations. Note that here we used that lower triangular  
505 halves of matrices  $L$  and  $H$  have the same sparsity patterns, which follows from the fact that banded  
506 graph is a chordal graph with perfect elimination order  $\{1, 2, \dots, n\}$ . Furthermore,  $X_t$  is positive  
507 definite, since as  $(H_{jj} - H_{I_j j}^T H_{I_j j}^{-1} H_{I_j j})$  is a schur complement of submatrix of  $H$  formed by  
508  $J_j = I_j \cup \{j\}$ .

509 *Proof of Theorem 3.1* The proof follows trivially from Theorem 3.1 when  $b$  is set to 1.

## 510 A.2 Regret bound analysis

511 *Proof sketch of Theorem 3.3* We decompose the regret into  $R_T \leq T_1 + T_2 + T_3$  in Lemma 1 and indi-  
512 vidually bound the terms. Term  $T_2 = \frac{1}{2\eta} \cdot \sum_{t=1}^{T-1} (w_{t+1} - w^*)^T (X_{t+1}^{-1} - X_t^{-1}) (w_{t+1} - w^*)$  depends on  
513 closeness of consecutive inverses of preconditioners,  $(X_{t+1}^{-1} - X_t^{-1})$ , to upperbound this we first give  
514 explicit expressions of  $X_t^{-1}$  for tridiagonal preconditioner in Lemma 2 in Appendix A.2.2. This ex-  
515 plicit expression is later used to bound each entry of  $(X_{t+1}^{-1} - X_t^{-1})$  with  $O(1/\sqrt{t})$  in Appendix A.2.4  
516 this gives a  $O(\sqrt{T})$  upperbound on  $T_2$ . To show an upperbound on  $T_3 = \sum_{t=1}^T \frac{\eta}{2} \cdot g_t^T X_t g_t$ , we  
517 individually bound  $g_t^T X_t g_t$  by using a Loewner order  $X_t \preceq \|X_t\|_2 I_n \preceq \|X_t\|_\infty I_n$  and show that  
518  $\|X_t\|_\infty = O(1/\sqrt{T})$  and consequently  $T_3 = O(\sqrt{T})$ .

### 519 A.2.1 Regret bound decomposition

520 In this subsection we state Lemma 1 which upper bound the regret  $R_T$  using three terms  $T_1, T_2, T_3$ .

521 **Lemma 1** ([25]). *In the OCO problem setup, if a prediction  $w_t \in \mathbb{R}^n$  is made at round  $t$  and is*  
522 *updated as  $w_{t+1} := w_t - \eta X_t g_t$  using a preconditioner matrix  $X_t \in S_n^{++}$*

$$R_T \leq \frac{1}{2\eta} \cdot (\|w_1 - w^*\|_{X_1^{-1}}^2 - \|w_{T+1} - w^*\|_{X_T^{-1}}^2) \quad (16)$$

$$+ \frac{1}{2\eta} \cdot \sum_{t=1}^{T-1} (w_{t+1} - w^*)^T (X_{t+1}^{-1} - X_t^{-1}) (w_{t+1} - w^*) \quad (17)$$

$$+ \sum_{t=1}^T \frac{\eta}{2} \cdot g_t^T X_t g_t \quad (18)$$

*Proof.*

$$\begin{aligned} \|w_{t+1} - w^*\|_{X_t^{-1}}^2 &= \|w_t - \eta X_t g_t - w^*\|_{X_t^{-1}}^2 \\ &= \|w_t - w^*\|_{X_t^{-1}}^2 + \eta^2 g_t^T X_t g_t \\ &\quad - 2\eta (w_t - w^*)^T g_t \\ \implies 2\eta (w_t - w^*)^T g_t &= \|w_t - w^*\|_{X_t^{-1}}^2 - \|w_{t+1} - w^*\|_{X_t^{-1}}^2 \\ &\quad + \eta^2 g_t^T X_t g_t \end{aligned}$$

523 □

524 Using the convexity of  $f_t$ ,  $f_t(w_t) - f_t(w^*) \leq (w_t - w^*)^T g_t$ , where  $g_t = \Delta f_t(w_t)$  and summing  
525 over  $t \in [T]$

$$R_T \leq \sum_{t=1}^T \frac{1}{2\eta} \cdot (\|w_t - w^*\|_{X_t^{-1}}^2 - \|w_{t+1} - w^*\|_{X_t^{-1}}^2) \quad (19)$$

$$+ \frac{\eta}{2} \cdot g_t^T X_t g_t \quad (20)$$

526 The first summation can be decomposed as follows

$$\begin{aligned}
& \sum_{t=1}^T \left( \|w_t - w^*\|_{X_t^{-1}}^2 - \|w_{t+1} - w^*\|_{X_t^{-1}}^2 \right) \\
&= \left( \|w_1 - w^*\|_{X_1^{-1}}^2 - \|w_{T+1} - w^*\|_{X_T^{-1}}^2 \right) \\
&+ \sum_{t=1}^{T-1} (w_{t+1} - w^*)^T (X_{t+1}^{-1} - X_t^{-1}) (w_{t+1} - w^*)
\end{aligned}$$

527 Substituting the above identity in the Equation (19) proves the lemma.

528 Let  $R_T \leq T_1 + T_2 + T_3$ , where

529 •  $T_1 = \frac{1}{2\eta} \cdot (\|w_1 - w^*\|_{X_1^{-1}}^2 - \|w_{T+1} - w^*\|_{X_T^{-1}}^2)$

•

$$T_2 = \frac{1}{2\eta} \cdot \sum_{t=1}^{T-1} (w_{t+1} - w^*)^T (X_{t+1}^{-1} - X_t^{-1}) (w_{t+1} - w^*) \quad (21)$$

530 •  $T_3 = \sum_{t=1}^T \frac{\eta}{2} \cdot g_t^T X_t g_t$

### 531 A.2.2 Properties of tridiagonal preconditioner

532 In this subsection, we derive properties of the tridigonal preconditioner obtained from solving the  
533 LogDet subproblem (11) with  $\mathcal{G}$  set to a chain graph over ordered set of vertices  $\{1, \dots, n\}$ :

$$X_t = \arg \min_{X \in S_n(\mathcal{G})^{++}} -\log \det(X) + \text{Tr}(XH_t) \quad (22)$$

$$= \arg \min_{X \in S_n(\mathcal{G})^{++}} D_{\ell d}(X, H_t^{-1}) \quad (23)$$

534 The second equality holds true only when  $H_t$  is positive definite. Although in Algorithm 1 we  
535 maintain a sparse  $H_t = H_{t-1} + P_{\mathcal{G}}(g_t g_t^T / \lambda_t)$ ,  $H_0 = \epsilon I_n$  which is further used in (22) to find the  
536 preconditioner  $X_t$ , our analysis assumes the full update  $H_t = H_{t-1} + g_t g_t^T / \lambda_t$ ,  $H_0 = \epsilon I_n$  followed  
537 by preconditioner  $X_t$  computation using (23). Note that the preconditioners  $X_t$  generated both ways  
538 are the same, as shown in Section 3.2.

539 The following lemma shows that the inverse of tridiagonal preconditioners used in Algorithm 1, will  
540 restore  $H_{i,j}$ , when  $(i, j)$  fall in the tridiagonal graph, else, the expression is related to product of  
541  $H_{i+k, i+k+1}$  corresponding to the edges in the path from node  $i$  to  $j$  in chain graph. This lemma will  
542 be used later in upperbounding  $T_2$ .

543 **Lemma .2** (Inverse of tridiagonal preconditioner). *If  $\mathcal{G} = \text{chain/tridiagonal graph}$  and  $\hat{X} =$   
544  $\arg \min_{X \in S_n(\mathcal{G})^{++}} D_{\ell d}(X, H^{-1})$ , then the inverse  $\hat{X}^{-1}$  has the following expression*

$$(\hat{X}^{-1})_{ij} = \begin{cases} H_{ij} & |i - j| \leq 1 \\ \frac{H_{ii+1} H_{i+1i+2} \dots H_{j-1j}}{H_{i+1i+1} \dots H_{j-1j-1}} & \end{cases} \quad (24)$$

*Proof.*

$$\hat{X}^{-1} \hat{X}^{(j)} = e_j$$

545 Where  $\hat{X}^{(j)}$  is the  $j^{\text{th}}$  column of  $\hat{X}$ . Let  $\hat{Y}$  denote the right hand side of Equation (24).

$$\begin{aligned}
(\hat{Y} \hat{X})_{jj} &= \hat{X}_{jj} \hat{Y}_{jj} + \hat{X}_{j-1j} \hat{Y}_{j-1j} + \hat{X}_{jj+1} \hat{Y}_{jj+1} \\
&= \hat{X}_{jj} H_{jj} + \hat{X}_{j-1j} H_{j-1j} + \hat{X}_{jj+1} H_{jj+1} \\
&= 1
\end{aligned}$$

546 The third equality is by using the following alternative form of Equation (12):

$$(\hat{X}^{(1)})_{i,j} = \begin{cases} 0, & \text{if } j - i > 1 \\ \frac{-H_{i,i+1}}{(H_{ii}H_{i+1,i+1} - H_{i+1,i+1}^2)}, & \text{if } j = i + 1 \\ \frac{1}{H_{ii}} \left( 1 + \sum_{j \in \text{neig}_{\mathcal{G}}(i)} \frac{H_{ij}^2}{H_{ii}H_{jj} - H_{ij}^2} \right), & \text{if } i = j \end{cases}, \quad (25)$$

547 where  $i < j$ . Similarly, the offdiagonals of  $\hat{Y}\hat{X}$  can be evaluated to be zero as follows.

$$\begin{aligned} (\hat{Y}\hat{X})_{ij} &= \hat{Y}_{ij}\hat{X}_{jj} + \hat{Y}_{ij-1}\hat{X}_{j-1j} + \hat{Y}_{ij+1}\hat{X}_{j+1j} \\ &= \hat{Y}_{ij}\hat{X}_{jj} + \hat{Y}_{ij}\frac{H_{j-1j-1}}{H_{j-1j}} + \hat{Y}_{ij}\frac{H_{jj+1}}{H_{jj}}\hat{X}_{j+1j} \\ &= 0 \end{aligned}$$

548

□

549 **Lemma 3.** Let  $y \in \mathbb{R}^n$ ,

550  $\beta = \max_t \max_{i \in [n-1]} |(H_t)_{ii+1}| / \sqrt{(H_t)_{ii}(H_t)_{i+1i+1}} < 1$ , then

$$y^T X_t^{-1} y \leq \|y\|_2^2 \|\text{diag}(H_t)\|_2 \left( \frac{1 + \beta}{1 - \beta} \right),$$

551 where  $X_t$  is defined as in Lemma 2

552 *Proof.* Let  $\tilde{X}_t^{-1} = \text{diag}(H_t)^{-1/2} \hat{X}_t \text{diag}(H_t)^{-1/2}$

$$y^T X_t^{-1} y \leq \left\| \text{diag}(H_t)^{1/2} y \right\|_2^2 \left\| \tilde{X}_t^{-1} \right\|_2 \quad (26)$$

553 Using the identity of spectral radius  $\rho(X) \leq \|X\|_\infty$  and since  $\tilde{X}$  is positive definite,  $\left\| \tilde{X}_t^{-1} \right\|_2 \leq$

554  $\left\| \tilde{X}_t^{-1} \right\|_\infty$

$$\begin{aligned} \left\| \tilde{X}_t^{-1} \right\|_2 &\leq \max_i \left\{ \sum_j |(\tilde{X}_t^{-1})_{ij}| \right\} \\ &\leq 1 + 2(\beta + \beta^2 + \dots) \\ &\leq \frac{1 + \beta}{1 - \beta} \end{aligned}$$

555 The second inequality is using Lemma 2. Substituting this in Equation (26) will give the lemma. □

### 556 A.2.3 Upperbounding Regret

557 The following Lemma is used in upperbounding both  $T_1$  and  $T_3$ . In next subsection, we'll upper  
558 bound  $T_2$  as well.

559 **Lemma 4.** Let  $\beta = \max_{t \in [T]} \max_{i \in [n-1]} |(H_t)_{ii+1}| / \sqrt{(H_t)_{ii}(H_t)_{i+1i+1}}$ , then

$$1/(1 - \beta) \leq 8/\hat{\epsilon}^2,$$

560 where,  $\hat{\epsilon}$  is a constant in parameter  $\epsilon = \hat{\epsilon} G_\infty \sqrt{T}$  and consequently used in initializing  $H_0 = \epsilon I_n$  in  
561 line 1 in Algorithm 1

*Proof.*

$$1/(1 - \beta) = \max_t \max_{i \in [n-1]} \frac{1}{1 - |(\hat{H}_t)_{ii+1}|} \quad (27)$$

$$= \max_t \max_{i \in [n-1]} \frac{1 + |(\hat{H}_t)_{ii+1}|}{1 - (\hat{H}_t)_{ii+1}^2} \quad (\text{where } (\hat{H}_t)_{ii+1} = (H_t)_{ii+1}/\sqrt{(H_t)_{ii}(H_t)_{i+1i+1}})$$

$$\leq \max_t \max_{i \in [n-1]} \frac{2(H_t)_{ii}(H_t)_{i+1i+1}}{(H_t)_{ii}(H_t)_{i+1i+1} - (H_t)_{ii+1}^2} \quad (\text{since } |(H_t)_{ii+1}| \leq \sqrt{(H_t)_{ii}(H_t)_{i+1i+1}})$$

$$\leq \max_t \max_{i \in [n-1]} \frac{2(H_t)_{ii}(H_t)_{i+1i+1}}{\det \left( \begin{bmatrix} (H_t)_{ii} & (H_t)_{ii+1} \\ (H_t)_{i+1i} & (H_t)_{i+1i+1} \end{bmatrix} \right)} \quad (28)$$

562 Note that  $\begin{bmatrix} (H_t)_{ii} & (H_t)_{ii+1} \\ (H_t)_{i+1i} & (H_t)_{i+1i+1} \end{bmatrix} \succeq \epsilon \begin{bmatrix} 1 & 0 \\ 0 & 1 \end{bmatrix}$  (using line 1 in Algorithm 1), thus  
 563  $\det \left( \begin{bmatrix} (H_t)_{ii} & (H_t)_{ii+1} \\ (H_t)_{i+1i} & (H_t)_{i+1i+1} \end{bmatrix} \right) \geq \det \left( \epsilon \begin{bmatrix} 1 & 0 \\ 0 & 1 \end{bmatrix} \right) = \epsilon^2$ . The numerator last inequality can  
 564 be upperbounded by bounding  $(H_t)_{ii}$  individually as follows:

$$\begin{aligned} (H_t)_{ii} &= \sum_{s=1}^t (g_s)_i^2 / \lambda_s \\ &= \sum_{s=1}^t (g_s)_i^2 / \lambda_s \\ &= \sum_{s=1}^t (g_s)_i^2 / (G_\infty \sqrt{s}) \\ &\leq \sum_{s=1}^t G_\infty^2 / (G_\infty \sqrt{s}) \\ &\leq \sum_{s=1}^t \frac{G_\infty}{\sqrt{s}} \\ &\leq 2G_\infty \sqrt{t} \end{aligned} \quad (29)$$

565 Substituting the above in (28) gives

$$\begin{aligned} 1/(1 - \beta) &\leq \max_t \frac{8G_\infty^2 t}{\epsilon^2 G_\infty^2 T} \\ &\leq \frac{8}{\epsilon^2} \end{aligned}$$

566

□

**Lemma .5** (*Upperbound of  $T_1$* ).

$$T_1 \leq \frac{16D_2^2 G_\infty \sqrt{T}}{\epsilon^2 \eta}, \quad (30)$$

567 where  $D_2 = \max_{t \in [T]} \|w_t - w^*\|_2$  and  $G_\infty = \max_t \|g_t\|_\infty$

568 *Proof.* Since  $X_T$  is positive definite

$$\begin{aligned}
T_1 &\leq \frac{\|w_1 - w^*\|_{X_1^{-1}}^2}{2\eta} \\
&= \frac{(y^{(1)})^T X_1^{-1} y^{(1)}}{2\eta} && \text{(where } y^{(1)} = w_1 - w^*) \\
&\leq \frac{\|y^{(1)}\|_2^2 \|\text{diag}(H_1)\|_2}{2\eta} \cdot \frac{1 + \beta}{1 - \beta} && \text{(Lemma 3)} \\
&\leq \frac{D_2^2 (G_\infty^2 / \lambda_1 + \epsilon)}{2\eta} \cdot \frac{1 + \beta}{1 - \beta} && \text{(line 4 in Algorithm 1)} \\
&\leq \frac{8D_2^2 (G_\infty^2 / \lambda_1 + \epsilon)}{\hat{\epsilon}^2 \eta} && \text{(Lemma 4)} \\
&\leq \frac{8D_2^2 (G_\infty + \hat{\epsilon} G_\infty \sqrt{T})}{\hat{\epsilon}^2 \eta} && \text{(Since } \lambda_t = G_\infty \sqrt{t} \text{ and } \epsilon = \hat{\epsilon} G_\infty \sqrt{T}) \\
&\leq \frac{16D_2^2 G_\infty \sqrt{T}}{\hat{\epsilon}^2 \eta} && (\hat{\epsilon} < 1)
\end{aligned}$$

569

□

**Lemma .6** ( $O(\sqrt{T})$  upperbound on  $T_3$ ).

$$T_3 = \sum_{t=1}^T \frac{\eta}{2} \cdot g_t^T X_t g_t \leq \frac{4nG_\infty \eta}{\hat{\epsilon}^3} \sqrt{T}$$

570 where,  $\|g_t\|_\infty \leq G_\infty$  and parameters  $\epsilon = \hat{\epsilon} G_\infty \sqrt{T}$ ,  $\lambda_t = G_\infty \sqrt{t}$  in Algorithm 1

571 *Proof.* Using Theorem 3.1 nonzero entries of  $X_t$  can be written as follows:

$$\begin{aligned}
(X_t)_{ii} &= \frac{1}{H_{ii}} \left( 1 + \sum_{(i,j) \in E_G} \frac{H_{ij}^2}{H_{ii} H_{jj} - H_{ij}^2} \right) \\
(X_t)_{ii+1} &= -\frac{H_{ii+1}}{H_{ii} H_{i+1i+1} - H_{ii+1}^2}
\end{aligned}$$

572 where,  $E_G$  denote the set of edges of the chain graph  $\mathcal{G}$  in Theorem 3.1. Also, for brevity, the subscript  
573 is dropped for  $H_t$ . Let  $\hat{X}_t = \sqrt{\text{diag}(H)} X_t \sqrt{\text{diag}(H)}$ , then  $\hat{X}_t$  can be written as

$$\begin{aligned}
(\hat{X}_t)_{ii} &= \left( 1 + \sum_{(i,j) \in E_G} \frac{\hat{H}_{ij}^2}{1 - \hat{H}_{ij}^2} \right), \\
(\hat{X}_t)_{ii+1} &= -\frac{\hat{H}_{ii+1}}{1 - \hat{H}_{ii+1}^2},
\end{aligned}$$

574 where,  $\hat{H}_{ij} = H_{ij} / \sqrt{H_{ii} H_{jj}}$ . Note that  $\hat{X}_t \preceq \|\hat{X}_t\|_2 I_n \preceq \|\hat{X}_t\|_\infty I_n$ , using  
575  $\max\{|\lambda_1(\hat{X}_t)|, \dots, |\lambda_n(\hat{X}_t)|\} \leq \|\hat{X}_t\|_\infty$  (property of spectral radius). So we upperbound  $\|\hat{X}_t\|_\infty =$   
576  $\max_{i \in [n]} \{ |(\hat{X}_t)_{11}| + |(\hat{X}_t)_{12}|, \dots, |(\hat{X}_t)_{ii-1}| + |(\hat{X}_t)_{ii}| + |(\hat{X}_t)_{ii+1}|, \dots, |(\hat{X}_t)_{nn}| + |(\hat{X}_t)_{nn-1}| \}$   
577 next. Individual terms  $|(\hat{X}_t)_{ii-1}| + |(\hat{X}_t)_{ii}| + |(\hat{X}_t)_{ii+1}|$  can be written as follows:

$$\begin{aligned}
\sum_{(i,j) \in E_{\mathcal{G}}} |(\hat{X}_t)_{ij}| &= 1 + \sum_{(i,j) \in E_{\mathcal{G}}} \frac{\hat{H}_{ij}^2}{1 - \hat{H}_{ij}^2} + \frac{|\hat{H}_{ij}|}{1 - \hat{H}_{ij}^2} \\
&= 1 + \sum_{(i,j) \in E_{\mathcal{G}}} \frac{|\hat{H}_{ij}|}{1 - |\hat{H}_{ij}|} \\
&\leq 2 \max_{i \in [n-1]} \frac{1}{1 - |\hat{H}_{ii+1}|}
\end{aligned}$$

578 The last inequality is because  $|\hat{H}_{ij}| \leq 1$ . Thus,  $\|\hat{X}_t\|_{\infty} \leq 2 \max_{i \in [n-1]} \frac{1}{1 - |\hat{H}_{ii+1}|}$ . Now

$$\begin{aligned}
g_t^T X_t g_t &\leq g_t^T \text{diag}(H_t)^{-1/2} \hat{X}_t \text{diag}(H_t)^{-1/2} g_t \\
&\leq \|\hat{X}_t\|_{\infty} \|\text{diag}(H_t)^{-1/2} g_t\|_2^2 && \left( \|\hat{X}_t\|_2 \leq \|\hat{X}_t\|_{\infty} \right) \\
&\leq 2 \max_{i \in [n-1]} \frac{1}{1 - |\hat{H}_{ii+1}|} g_t^T \text{diag}(H_t)^{-1} g_t.
\end{aligned}$$

579 Using  $\text{diag}(H_t) \succeq \epsilon I_n$  (step 1 in Algorithm 1), where  $\epsilon = \hat{\epsilon} G_{\infty} \sqrt{T}$  as set in Lemma A.8, gives

$$\begin{aligned}
g_t^T X_t g_t &\leq 2 \max_{i \in [n-1]} \frac{1}{1 - |\hat{H}_{ii+1}|} \frac{\|g_t\|_2^2}{\hat{\epsilon} G_{\infty} \sqrt{T}} \\
&\leq 2 \max_{i \in [n-1]} \frac{n G_{\infty}}{\hat{\epsilon} (1 - |\hat{H}_{ii+1}|) \sqrt{T}} \\
&\leq \frac{2n G_{\infty}}{\hat{\epsilon} (1 - \beta) \sqrt{T}} && \left( \text{where } \beta = \max_{t \in [T]} \max_{i \in [n-1]} |(\hat{H}_t)_{ii+1}| \right)
\end{aligned}$$

580 Summing up over  $t$  gives

$$\begin{aligned}
\sum_t \frac{\eta}{2} g_t^T X_t g_t &\leq \sum_t \frac{16n G_{\infty} \eta}{\hat{\epsilon}^3 \sqrt{T}} && \left( \text{Using Lemma 4} \right) \\
&\leq \frac{16n G_{\infty} \eta}{\hat{\epsilon}^3} \sqrt{T}
\end{aligned}$$

581

□

#### 582 A.2.4 $\mathcal{O}(\sqrt{T})$ Regret

583 In this section we derive a regret upper bound with a  $\mathcal{O}(T^{1/2})$  growth. For this, we upper bound  
584  $T_2$  as well in this section. In (21),  $T_2 = \sum_{t=2}^T (w_t - w^*)^T (X_t^{-1} - X_{t-1}^{-1}) (w_t - w^*)$  can be upper  
585 bounded to a  $\mathcal{O}(T^{1/2})$  by upperbounding entries of  $X_t^{-1} - X_{t-1}^{-1}$  individually. The following lemmas  
586 constructs a telescoping argument to bound  $|(X_t^{-1} - X_{t-1}^{-1})_{i,j}|$ .

587 **Lemma .7.** Let  $H, \tilde{H} \in S_n^{++}$ , such that  $\tilde{H} = H + gg^T/\lambda$ , where  $g \in \mathbb{R}^n$ , then

$$\begin{aligned}
&\frac{\tilde{H}_{ij}}{\sqrt{\tilde{H}_{ii} \tilde{H}_{jj}}} - \frac{H_{ij}}{\sqrt{H_{ii} H_{jj}}} \\
&= \frac{g_i g_j}{\lambda \sqrt{\tilde{H}_{ii} \tilde{H}_{jj}}} + \frac{H_{ij}}{\sqrt{H_{ii} H_{jj}}} \left( \sqrt{\frac{H_{ii} H_{jj}}{\tilde{H}_{ii} \tilde{H}_{jj}}} - 1 \right) = \theta_{ij}
\end{aligned}$$

Proof.

$$\begin{aligned}
& \frac{\tilde{H}_{ij}}{\sqrt{\tilde{H}_{ii}\tilde{H}_{jj}}} - \frac{H_{ij}}{\sqrt{H_{ii}H_{jj}}} \\
&= \frac{1}{\sqrt{H_{ii}H_{jj}}} \left( \tilde{H}_{ij} \frac{\sqrt{H_{ii}H_{jj}}}{\sqrt{\tilde{H}_{ii}\tilde{H}_{jj}}} - H_{ij} \right) \\
&= \frac{1}{\sqrt{H_{ii}H_{jj}}} \left( g_i g_j \frac{\sqrt{H_{ii}H_{jj}}}{\sqrt{\tilde{H}_{ii}\tilde{H}_{jj}}} + H_{ij} \left( \frac{\sqrt{H_{ii}H_{jj}}}{\sqrt{\tilde{H}_{ii}\tilde{H}_{jj}}} - 1 \right) \right)
\end{aligned}$$

588

□

589 The following Lemma bounds the change in the inverse of preconditioner  $Y^{-1}$ , when there is a rank  
590 one perturbation to  $H \succ 0$  in following LogDet problem (11) :

$$\begin{aligned}
Y &= \arg \min_{X \in S_n(\mathcal{G})^{++}} -\log \det(X) + \text{Tr}(XH) \\
&= \arg \min_{X \in S_n(\mathcal{G})^{++}} \text{D}_{\ell d}(X, H)
\end{aligned}$$

591 **Lemma .8** (Rank 1 perturbation of LogDet problem (11)). Let  $H, \tilde{H} \in S_n^{++}$ , such that  
592  $\tilde{H} = H + gg^T/\lambda$ , where  $g \in \mathbb{R}^n$ . Also,  $\tilde{Y} = \arg \min_{X \in S_n(\mathcal{G})^{++}} \text{D}_{\ell d}(X, \tilde{H})$  and  $Y =$   
593  $\arg \min_{X \in S_n(\mathcal{G})^{++}} \text{D}_{\ell d}(X, H)$ , where  $\mathcal{G}$  is a chain graph, then

$$\left| (\tilde{Y}^{-1} - Y^{-1})_{ii+k} \right| \leq G_\infty^2 \kappa(k\beta + k + 2) \beta^{k-1} / \lambda,$$

594 where  $i, i+k \leq n$ ,  $G_\infty = \|g\|_\infty$  and  $\max_{i,j} |H_{ij}| / \sqrt{H_{ii}H_{jj}} \leq \beta < 1$ . Let  $\kappa(\text{diag}(H)) :=$   
595  $\text{condition number of the diagonal part of } H$ , then  $\kappa := \max(\kappa(\text{diag}(H)), \kappa(\text{diag}(\tilde{H}))$ ).

596 Proof. Using Lemma 2 will give the following:

$$\begin{aligned}
& \left| (\tilde{Y}^{-1} - Y^{-1})_{ii+k} \right| \\
&= \left| \frac{\tilde{H}_{ii+1} \dots \tilde{H}_{i+k-1i+k}}{\tilde{H}_{i+1i+1} \dots \tilde{H}_{i+k-1i+k-1}} - \frac{H_{ii+1} \dots H_{i+k-1i+k}}{H_{i+1i+1} \dots H_{i+k-1i+k-1}} \right| \\
&= \left| \sqrt{\tilde{H}_{ii}\tilde{N}_{ii+1} \dots \tilde{N}_{i+k-1i+k}} \sqrt{\tilde{H}_{i+k-1i+k}} \right. \\
&\quad \left. - \sqrt{H_{ii}N_{ii+1} \dots N_{i+k-1i+k}} \sqrt{H_{i+k-1i+k}} \right| \\
&= \left| \sqrt{\tilde{H}_{ii}\tilde{H}_{i+k-1i+k}} \left| \tilde{N}_{ii+1} \dots \tilde{N}_{i+k-1i+k} - N_{ii+1} \dots N_{i+k-1i+k} \right| \sqrt{H_{ii}H_{i+k-1i+k} / \tilde{H}_{ii}\tilde{H}_{i+k-1i+k}} \right|
\end{aligned}$$

597 where  $N_{ij} = H_{ij} / \sqrt{H_{ii}H_{jj}} < 1$  (Since determinants of 2x2 submatrices of H are positive).

598 Expanding  $\tilde{N}_{ii+1} = N_{ii+1} + \theta_{ii+1}$  (from Lemma 7), subsequently  $\tilde{N}_{ii+2} = N_{ii+2} + \theta_{ii+2}$  and so  
599 on will give

$$\begin{aligned}
& \left| \tilde{N}_{ii+1} \dots \tilde{N}_{i+k-1i+k} - N_{ii+1} \dots N_{i+k-1i+k} \right| \sqrt{\frac{H_{ii}H_{i+k-1i+k}}{\tilde{H}_{ii}\tilde{H}_{i+k-1i+k}}} = \\
& \left| \theta_{ii+1} \tilde{N}_{i+1i+2} \dots \tilde{N}_{i+k-1i+k} + N_{ii+1} \left( \tilde{N}_{i+1i+2} \dots \tilde{N}_{i+k-1i+k} - N_{i+1i+2} \dots N_{i+k-1i+k} \right) \sqrt{\frac{H_{ii}H_{i+k-1i+k}}{\tilde{H}_{ii}\tilde{H}_{i+k-1i+k}}} \right|
\end{aligned}$$



600

$$\begin{aligned}
&= |\theta_{ii+1}\tilde{N}_{i+1i+2}\dots\tilde{N}_{i+k-1i+k} + N_{ii+1}\theta_{i+1i+2}\tilde{N}_{ii+3}\dots\tilde{N}_{i+k-1i+k} + \dots + N_{ii+1}\dots N_{ii+k-1}\theta_{i+k-1i+k} \\
&+ N_{ii+1}\dots N_{ii+k} \left(1 - \sqrt{\frac{H_{ii}H_{i+ki+k}}{\tilde{H}_{ii}\tilde{H}_{i+ki+k}}}\right) | \\
&\leq \left(\sum_{l=0}^{k-1} |\theta_{i+li+l+1}|\right)\beta^{k-1} + \beta^{k-1} \left|1 - \sqrt{\frac{H_{ii}H_{i+ki+k}}{\tilde{H}_{ii}\tilde{H}_{i+ki+k}}}\right|, \\
&\implies \left|(\tilde{Y}^{-1} - Y^{-1})_{ii+k}\right| \leq \sqrt{\tilde{H}_{ii}\tilde{H}_{i+ki+k}} \cdot \left(\sum_{l=0}^{k-1} |\theta_{i+li+l+1}|\right)\beta^{k-1} + \beta^{k-1} \left|1 - \sqrt{\frac{H_{ii}H_{i+ki+k}}{\tilde{H}_{ii}\tilde{H}_{i+ki+k}}}\right|
\end{aligned}$$

601 where  $\max_{i,j} |N_{i,j}|$ ,  $\max_{i,j} |\tilde{N}_{i,j}| \leq \beta < 1$ . Expanding  $\theta_{i+li+l+1}$  from Lemma [7](#) in the term602  $|\theta_{i+li+l+1}| \sqrt{\tilde{H}_{ii}\tilde{H}_{i+ki+k}}$  will give:

$$\begin{aligned}
&|\theta_{i+li+l+1}| \sqrt{\tilde{H}_{ii}\tilde{H}_{i+ki+k}} \\
&= \left| \sqrt{\tilde{H}_{ii}\tilde{H}_{i+ki+k}} \frac{g_{i+l}g_{i+l+1}}{\lambda\sqrt{\tilde{H}_{i+li+l}\tilde{H}_{i+l+1i+l+1}}} + \sqrt{\tilde{H}_{ii}\tilde{H}_{i+ki+k}} N_{i+li+l+1} \left( \sqrt{\frac{H_{i+li+l}H_{i+l+1i+l+1}}{\tilde{H}_{i+li+l}\tilde{H}_{i+l+1i+l+1}}} - 1 \right) \right| \\
&\leq \left| \sqrt{\tilde{H}_{ii}\tilde{H}_{i+ki+k}} \frac{g_{i+l}g_{i+l+1}}{\lambda\sqrt{\tilde{H}_{i+li+l}\tilde{H}_{i+l+1i+l+1}}} \right| + \left| \sqrt{\tilde{H}_{ii}\tilde{H}_{i+ki+k}} N_{i+li+l+1} \left( 1 - \sqrt{\frac{H_{i+li+l}H_{i+l+1i+l+1}}{\tilde{H}_{i+li+l}\tilde{H}_{i+l+1i+l+1}}} \right) \right|
\end{aligned}$$

603 Since  $H_{i+li+l}H_{i+l+1i+l+1} \leq \tilde{H}_{i+li+l}\tilde{H}_{i+l+1i+l+1}$ ,

$$\begin{aligned}
1 - \sqrt{\frac{H_{i+li+l}H_{i+l+1i+l+1}}{\tilde{H}_{i+li+l}\tilde{H}_{i+l+1i+l+1}}} &\leq \max\left(1 - \frac{H_{i+li+l}}{\tilde{H}_{i+li+l}}, 1 - \frac{H_{i+l+1i+l+1}}{\tilde{H}_{i+l+1i+l+1}}\right) \\
&\leq \max\left(\frac{g_{i+l}^2}{\lambda\tilde{H}_{i+li+l}}, \frac{g_{i+l+1}^2}{\lambda\tilde{H}_{i+l+1i+l+1}}\right)
\end{aligned}$$

604 Using the above,  $H_{i,i}/H_{j,j} \leq \kappa$ , and  $|g_i| \leq G_\infty$ ,  $\forall i, j \in [n]$ , gives

$$\begin{aligned}
\sqrt{\tilde{H}_{ii}\tilde{H}_{i+ki+k}} |\theta_{i+li+l+1}| &\leq G_\infty^2 \kappa / \lambda + \beta G_\infty^2 \kappa / \lambda \\
&\leq G_\infty^2 \kappa (1 + \beta) / \lambda
\end{aligned}$$

605 Thus the following part of  $\left|(\tilde{Y}^{-1} - Y^{-1})_{ii+k}\right|$  can be upperbounded:

$$\sqrt{\tilde{H}_{ii}\tilde{H}_{i+ki+k}} \left(\sum_{l=0}^{k-1} |\theta_{i+li+l+1}|\right)\beta^{k-1} \leq G_\infty^2 \kappa (1 + \beta) k \beta^{k-1} / \lambda$$

606 Also,  $\sqrt{\tilde{H}_{ii}\tilde{H}_{i+ki+k}} \beta^{k-1} \left|1 - \sqrt{\frac{H_{ii}H_{i+ki+k}}{\tilde{H}_{ii}\tilde{H}_{i+ki+k}}}\right| \leq \beta^{k-1} \kappa G_\infty^2 / \lambda$ , so

$$\left|(\tilde{Y}^{-1} - Y^{-1})_{ii+k}\right| \leq G_\infty^2 \kappa (k\beta + k + 2) \beta^{k-1} / \lambda$$

607 □

608 **Lemma .9** ( $\mathcal{O}(\sqrt{T})$  upper bound of  $T_2$ ). Given that  $\kappa(\text{diag}(H_t)) \leq \kappa$ ,  $\|w_t - w^*\|_2 \leq D_2$ ,  
609  $\max_{i,j} |(H_t)_{ij}| / \sqrt{(H_t)_{ii}(H_t)_{jj}} \leq \beta < 1$ ,  $\forall t \in [T]$  in Algorithm [1](#), then  $T_2$  in Appendix [A.2.1](#)  
610 can be bounded as follows:

$$T_2 \leq \frac{2048\sqrt{T}}{\eta\hat{\epsilon}^5} (G_\infty D_2^2)$$

611 where  $\lambda_t = G_\infty \sqrt{t}$ , and  $\epsilon = \hat{\epsilon} G_\infty \sqrt{T}$  in Algorithm [1](#) and  $\hat{\epsilon} \leq 1$  is a constant.

612 *Proof.* Note that  $T_2 = \frac{1}{2\eta} \cdot \sum_{t=1}^{T-1} (w_{t+1} - w^*)^T (X_{t+1}^{-1} - X_t^{-1}) (w_{t+1} - w^*) \leq$   
613  $\sum_{t=1}^{T-1} D_2^2 \|(X_{t+1}^{-1} - X_t^{-1})\|_2 / (2\eta)$ . Using  $\|A\|_2 = \rho(A) \leq \|A\|_\infty$  for symmetric matrices  $A$ ,  
614 we get

$$\begin{aligned} \|X_{t+1}^{-1} - X_t^{-1}\|_2 &\leq \|X_{t+1}^{-1} - X_t^{-1}\|_\infty \\ &= \max_i \left( \sum_j |(X_{t+1}^{-1} - X_t^{-1})_{ij}| \right) \\ &\leq 16 \frac{G_\infty \kappa}{\sqrt{t}(1-\beta)^2} \quad (\text{Lemma } \boxed{8}) \\ &\leq 1024 \cdot \frac{G_\infty \kappa}{\sqrt{t} \hat{\epsilon}^4} \end{aligned}$$

615 Now using  $\kappa \leq 2/\hat{\epsilon}$  (using Equation [\(29\)](#)) and  $(H_t)_{ii} > \hat{\epsilon}$  and summing up terms in  $T_2$  using the  
616 above will give the result.  $\square$

617 Putting together  $T_1$ ,  $T_2$  and  $T_3$  from Lemma [\(5\)](#) Lemma [\(9\)](#) and Lemma [\(6\)](#) respectively, when  $\epsilon$ ,  $\lambda_t$   
618 are defined as in Lemma [\(9\)](#)  
619

$$T_1 \leq \frac{16D_2^2 G_\infty \sqrt{T}}{\hat{\epsilon}^2 \eta},$$

$$T_2 \leq \frac{2048\sqrt{T}}{\eta \hat{\epsilon}^5} (G_\infty D_2^2) \quad (31)$$

$$T_3 \leq \frac{4nG_\infty \eta}{\hat{\epsilon}^3} \sqrt{T} \quad (32)$$

620 Setting  $\eta = \frac{D_2}{\hat{\epsilon} \sqrt{n}}$

$$R_T \leq T_1 + T_2 + T_3 \leq O(\sqrt{n} G_\infty D_2 \sqrt{T})$$

### 621 A.2.5 Non-convex guarantees

622 Minimizing smooth non-convex functions  $f$  is a complex yet interesting problem. In Agarwal  
623 et al. [\[1\]](#), this problem is reduced to an online convex optimization, where a sequence of objectives  
624  $f_t(w) = f(w) + c \|w - w_t\|_2^2$  are minimized. Using this approach Agarwal et al. [\[1\]](#) established  
625 convergence guarantees to reach a stationary point via regret minimization. Thus non-convex  
626 guarantees can be obtained from regret guarantees and is our main focus in the paper.

### 627 A.3 Numerical stability

628 In this section we conduct perturbation analysis to derive an end-to-end componentwise condition  
629 number (pg. 135, problem 7.11 in [\[26\]](#)) upper bound of the tridiagonal explicit solution in Theo-  
630 rem [\(3.1\)](#). In addition to this, we devise Algorithm [\(3\)](#) to reduce this condition number upper bound  
631 for the tridiagonal sparsity structure, and be robust to  $H_t$  which don't follow the non-degeneracy  
632 condition: any principle submatrix of  $H_t$  corresponding to a complete subgraph of  $\mathcal{G}$ .

633 **Theorem .10** (Condition number of tridiagonal LogDet subproblem [\(11\)](#)). *Let  $H \in S_n^{++}$  be such*  
634 *that  $H_{ii} = 1$  for  $i \in [n]$ . Let  $\Delta H$  be a symmetric perturbation such that  $\Delta H_{ii} = 0$  for  $i \in [n]$ , and*  
635  *$H + \Delta H \in S_n^{++}$ . Let  $P_{\mathcal{G}}(H)$  be the input to [\(11\)](#) where  $\mathcal{G}$  is a chain graph, then*

$$\kappa_\infty^{\ell d} \leq \max_{i \in [n-1]} 2/(1 - \beta_i^2) = \hat{\kappa}_\infty^{\ell d}, \quad (33)$$

636 where,  $\beta_i = H_{ii+1}, \kappa_\infty^{\ell d} :=$  componentwise condition number of [\(11\)](#) for perturbation  $\Delta H$ .

637 The tridiagonal LogDet problem with inputs  $H$  as mentioned in Theorem [\(10\)](#) has high condition  
638 number when  $1 - \beta_i^2 = H_{ii} - H_{ii+1}^2 / H_{i+1i+1}$  are low and as a result the preconditioner  $X_t$  in

639 SONew (Algorithm 1) has high componentwise relative errors. We develop Algorithm 3 to be robust  
640 to degenerate inputs  $H$ , given that  $H_{ii} > 0$ . It finds a subgraph  $\tilde{\mathcal{G}}$  of  $\mathcal{G}$  for which non-degeneracy  
641 conditions in Theorem 3.2 is satisfied and (14) is well-defined. This is done by removing edges which  
642 causes inverse  $H_{I_j I_j}^{-1}$  to be singular or  $(H_{jj} - H_{I_j j}^T H_{I_j I_j}^{-1} H_{I_j j})$  to be low. In the following theorem we  
643 also show that the condition number upper bound in Theorem 10 reduces in tridiagonal case. To test  
644 the robustness of this method we conducted an ablation study in Table 5 in an Autoencoder benchmark  
645 (from Section 5) in bfloat16 where we demonstrate noticeable improvement in performance when  
646 Algorithm 3 is used.

647 **Theorem .11** (Numerically stable algorithm). *Algorithm 3 finds a subgraph  $\tilde{\mathcal{G}}$  of  $\mathcal{G}$ , such that  
648 explicit solution for  $\tilde{\mathcal{G}}$  in (14) is well-defined. Furthermore, when  $\mathcal{G}$  is a tridiagonal/chain graph, the  
649 component-wise condition number upper bound in (33) is reduced upon using Algorithm 3  $\hat{\kappa}_{\ell_d}^{\tilde{\mathcal{G}}} < \hat{\kappa}_{\ell_d}^{\mathcal{G}}$ ,  
650 where  $\hat{\kappa}_{\ell_d}^{\tilde{\mathcal{G}}}$ ,  $\hat{\kappa}_{\ell_d}^{\mathcal{G}}$  are defined as in Theorem 10 for graphs  $\tilde{\mathcal{G}}$  and  $\mathcal{G}$  respectively.*

The proofs for Theorems 10 and 11 are given in the following subsections.

---

**Algorithm 3** Numerically stable banded LogDet solution

---

- 1: **Input:**  $\mathcal{G}$ – tridiagonal or banded graph,  $H$ – symmetric matrix in  $\mathbb{R}^{n \times n}$  with sparsity structure  $\mathcal{G}$  and  $H_{ii} > 0$ ,  $\gamma$ – tolerance parameter for low schur complements.
  - 2: **Output:** Finds subgraph  $\tilde{\mathcal{G}}$  of  $\mathcal{G}$  without any degenerate cases from Lemma 13 and finds preconditioner  $\hat{X}$  corresponding to the subgraph
  - 3: Let  $E_i = \{(i, j) : (i, j) \in E_{\mathcal{G}}\}$  be edges from vertex  $i$  to its neighbours in graph  $\mathcal{G}$ .
  - 4: Let  $V_i^+ = \{j : i < j, (i, j) \in E_{\mathcal{G}}\}$  and  $V_i^- = \{j : i > j, (i, j) \in E_{\mathcal{G}}\}$ , denote positive and negative neighbourhood of vertex  $i$ .
  - 5: Let  $K = \left\{ i : H_{ii} - H_{I_i i}^T H_{I_i I_i}^{-1} H_{I_i i} \text{ is undefined or } \leq \gamma \right\}$
  - 6: Consider a new subgraph  $\tilde{\mathcal{G}}$  with edges  $E_{\tilde{\mathcal{G}}} = E_{\mathcal{G}} \setminus (\bigcup_{i \in K} E_i \cup (V_i^+ \times V_i^-))$
  - 7: **return**  $\hat{X} := \text{SPARSIFIED\_INVERSE}(\tilde{H}_t, \tilde{\mathcal{G}})$ , where  $\tilde{H}_t = P_{\tilde{\mathcal{G}}}(H_t)$
- 

651

### 652 A.3.1 Condition number analysis

653 **Theorem .12** (Full version of Theorem 10). *Let  $H \in S_n^{++}$  such that  $H_{ii} = 1$ , for  $i \in [n]$  and  
654 a symmetric perturbation  $\Delta H$  such that  $\Delta H_{ii} = 0$ , for  $i \in [n]$  and  $H + \Delta H \succ 0$ . Let  $\hat{X} =$   
655  $\arg \min_{X \in S_n(\mathcal{G})^{++}} \text{D}_{\ell_d}(X, H^{-1})$  and  $\hat{X} + \Delta \hat{X} = \arg \min_{X \in S_n(\mathcal{G})^{++}} \text{D}_{\ell_d}(X, (H + \Delta H)^{-1})$ ,  
656 here  $\mathcal{G} := \text{chain/tridiagonal sparsity graph}$  and  $S_n(\mathcal{G})^{++}$  denotes positive definite matrices which  
657 follows the sparsity pattern  $\mathcal{G}$ .*

$$\begin{aligned} \kappa_{\ell_d} &= \limsup_{\epsilon \rightarrow 0} \left\{ \frac{|\Delta \hat{X}_{ij}|}{\epsilon |\hat{X}_{ij}|} : |\Delta H_{k,l}| \leq \epsilon |H_{k,l}|, (k,l) \in E_{\mathcal{G}} \right\} \\ &\leq \max_{i \in [n-1]} 1/(1 - \beta_i^2) \end{aligned}$$

658 where,  $\kappa_{\ell_d} := \text{condition number of the LogDet subproblem}$ ,  $\kappa_2(\cdot) := \text{condition number of a matrix in}$   
659  $\ell_2$  norm,  $\beta_i = H_{ii+1}/\sqrt{H_{ii}H_{i+1i+1}}$

660 *Proof.* Consider the offdiagonals for which  $(\hat{X} + \Delta \hat{X})_{ii+1} = -H_{ii+1}/(1 - H_{ii+1}^2) =$   
661  $f(H_{ii+1})$ , where  $f(x) = -x/(1 - x^2)$ . Let  $y = f(x)$ ,  $\hat{y} = f(x + \Delta x)$  and  $|\Delta x/x| \leq \epsilon$  then  
662 using Taylor series

$$\begin{aligned} \left| \frac{\hat{y} - y}{y} \right| &= \left| \frac{x f'(x)}{f(x)} \right| \left| \frac{\Delta x}{x} \right| + O((\Delta x)^2) \\ \implies \lim_{\epsilon \rightarrow 0} \left| \frac{\hat{y} - y}{\epsilon y} \right| &\leq \frac{x f'(x)}{f(x)} \end{aligned}$$

663 Using the above inequality, with  $x := H_{ii+1}$  and  $y := \hat{X}_{ii+1}$ ,

$$\begin{aligned} \lim_{\epsilon \rightarrow 0} \left| \frac{\Delta \hat{X}_{ii+1}}{\epsilon \hat{X}_{ii+1}} \right| &\leq \frac{1 + H_{ii+1}^2}{1 - H_{ii+1}^2} \\ &\leq \frac{2}{1 - H_{ii+1}^2} \end{aligned} \quad (34)$$

664 Let  $g(x) = x^2/(1 - x^2)$ , let  $y_1 = g(w_1)$ ,  $y_2 = g(x_2)$ ,  $\hat{y}_1 = g(w_1 + \Delta x)$ ,  $\hat{y}_2 = g(x_2 + \Delta x)$ . Using  
665 Taylor series

$$\begin{aligned} \left| \frac{\hat{y}_1 - y_1}{y_1} \right| &= \left| \frac{x_1 f'(x_1)}{f(x_1)} \right| \left| \frac{\Delta x_1}{x_1} \right| + O((\Delta x_1)^2) \\ \left| \frac{\hat{y}_2 - y_2}{y_2} \right| &= \left| \frac{x_2 f'(x_2)}{f(x_2)} \right| \left| \frac{\Delta x_2}{x_2} \right| + O((\Delta x_2)^2) \\ \implies \lim_{\epsilon \rightarrow 0} \frac{\Delta y_1 + \Delta y_2}{\epsilon(1 + y_1 + y_2)} &\leq \max \left( \frac{2}{1 - x_1^2}, \frac{2}{1 - x_2^2} \right) \end{aligned}$$

666 Putting  $x_1 := H_{ii+1}$ ,  $x_2 := H_{ii-1}$  and analyzing  $y_1 := H_{ii+1}^2/(1 - H_{ii+1}^2)$  and  $y_2 := H_{ii-1}^2/(1 -$   
667  $H_{ii-1}^2)$  will result in the following

$$\lim_{\epsilon \rightarrow 0} \left| \frac{\Delta \hat{X}_{ii}}{\hat{X}_{ii}} \right| \leq \max \left( \frac{2}{1 - H_{ii+1}^2}, \frac{2}{1 - H_{ii-1}^2} \right) \quad (35)$$

668 Since  $\hat{X}_{ii} = 1 + H_{ii+1}^2/(1 - H_{ii+1}^2) + H_{ii-1}^2/(1 - H_{ii-1}^2)$ . Putting together Equation (35) and  
669 Equation (34), the theorem is proved.  $\square$

### 670 A.3.2 Degenerate $H_t$

671 In SONew (1), the  $H_t = P_G(\sum_{s=1}^t g_s g_s^T / \lambda_t)$  generated in line 4 could be such that the matrix  
672  $\sum_{s=1}^t g_s g_s^T / \lambda_t$  need not be positive definite and so the schur complements  $H_{ii} - H_{ii+1}^2/H_{i+1i+1}$   
673 can be zero, giving an infinite condition number  $\kappa_\infty^{\text{eld}}$  by Theorem 10. The following lemma describes  
674 such cases in detail for a more general banded sparsity structure case.

675 **Lemma .13** (Degenerate inputs to banded LogDet subproblem). *Let  $H = P_G(GG^T)$ , when  $\epsilon = 0$  in  
676 Algorithm 1 where  $G \in \mathbb{R}^{n \times T}$  and let  $g_{1:T}^{(i)}$  be  $i^{\text{th}}$  row of  $G$ , which is gradients of parameter  $i$  for  $T$   
677 rounds, then  $H_{ij} = \langle g_{1:T}^{(i)}, g_{1:T}^{(j)} \rangle$ .*

678 • *Case 1: For tridiagonal sparsity structure  $\mathcal{G}$ : if  $g_{1:T}^{(j)} = g_{1:T}^{(j+1)}$ , then  $H_{jj} -$   
679  $H_{jj+1}^2/H_{j+1j+1} = 0$ .*

680 • *Case 2: For  $b > 1$  in (14): If  $\text{rank}(H_{J_j J_j}) = \text{rank}(H_{I_j I_j}) = b$ , then  $(H_{jj} -$   
681  $H_{I_j J_j}^T H_{I_j I_j}^{-1} H_{I_j J_j}) = 0$  and  $D_{jj} = \infty$ . If  $\text{rank}(H_{I_j I_j}) < b$  then the inverse  $H_{I_j I_j}^{-1}$  doesn't  
682 exist and  $D_{jj}$  is not well-defined.*

683 *Proof.* For  $b = 1$ , if  $g_{1:T}^{(j)} = g_{1:T}^{(j+1)}$ , then  $H_{jj+1} = H_{jj} = H_{j+1j+1} = \|g_{1:T}^{(j)}\|_2^2$ , thus  $H_{jj} -$   
684  $H_{jj+1}^2/H_{j+1j+1} = 0$ .

685 For  $b > 1$ , since  $H_{I_j I_j}$ , using Guttman rank additivity formula,  $\text{rank}(H_{jj} - H_{jj+1}^2/H_{j+1j+1}) =$   
686  $\text{rank}(H_{J_j J_j}) - \text{rank}(H_{I_j I_j}) = 0$ , thus  $H_{jj} - H_{jj+1}^2/H_{j+1j+1} = 0$ .

687 Furthermore, if  $\text{rank}(H) \leq b$ , then all  $b + 1 \times b + 1$  principal submatrices of  $H$  have rank  $b$ , thus  $\forall j$ ,  
688  $H_{J_j J_j}$  have a rank  $b$ , thus  $D_{jj}$  for all  $j$  are undefined.

689  $\square$

690 If  $GG^T = \sum_{i=1}^T g_i g_i$  is a singular matrix, then solution to the LogDet problem might not be well-  
691 defined as shown in Lemma 13. For instance, Case 1 can occur when preconditioning the input layer  
692 of an image-based DNN with flattened image inputs, where  $j^{\text{th}}$  and  $(j + 1)^{\text{th}}$  pixel can be highly  
693 correlated throughout the dataset. Case 2 can occur in the first  $b$  iterations in Algorithm 1 when the  
694 rank of submatrices  $\text{rank}(H_{I_j I_j}) < b$  and  $\epsilon = 0$ .

Table 3: **float32 experiments on Autoencoder benchmark using different band sizes.** Band size 0 corresponds to diag-SONew and 1 corresponds to tridiag-SONew. We see the training loss getting better as we increase band size

| Band size     | 0 (diag-SONew) | 1 (tridiag-SONew) | 4      | 10     |
|---------------|----------------|-------------------|--------|--------|
| Train CE loss | 53.025         | 51.723            | 51.357 | 51.226 |

### 695 A.3.3 Numerically Stable SONew proof

696 *Proof of Theorem 11*

697 Let  $I_i = \{j : i < j, (i, j) \in E_G\}$  and  $I'_i = \{j : i < j, (i, j) \in E_{\tilde{G}}\}$  Let  $K =$   
698  $\{i : H_{ii} - H_{I_i}^T H_{I_i}^{-1} H_{I_i} \text{ is undefined or } 0, i \in [n]\}$  denote vertices which are getting removed by  
699 the algorithm, then for the new graph  $\tilde{G}$ ,  $D_{ii} = 1/H_{ii}, \forall i \in K$  since  $H_{ii} > 0$ .  
700 Let  $\bar{K} = \{i : H_{ii} - H_{I_i}^T H_{I_i}^{-1} H_{I_i} > 0, i \in [n]\}$ . Let for some  $j \in \bar{K}$ , if

$$l = \arg \min \{i : j < i, i \in K \cap I_j\},$$

701 denotes the nearest connected vertex higher than  $j$  for which  $D_{ll}$  is undefined or zero, then according  
702 to the definition  $E_{\tilde{G}}$  in Algorithm 3,  $I'_j = \{j + 1, \dots, l - 1\} \subset I_j$ , since  $D_{jj}$  is well-defined,  $H_{I_j I_j}$  is  
703 invertible, which makes it a positive definite matrix (since  $H$  is PSD). Since  $H_{jj} - H_{I_j}^T H_{I_j}^{-1} H_{I_j} >$   
704  $0$ , using Guttman rank additivity formula  $H_{J_j J_j} \succ 0$ , where  $J_j = I_j \cup j$ . Since  $H_{J_j J_j}$  is a submatrix  
705 of  $H_{J_j J_j}$ , it is positive definite and hence its schur complement  $H_{jj} - H_{I_j}^T H_{I_j}^{-1} H_{I_j} > 0$ . Thus  
706 for all  $j \in [n]$ , the corresponding  $D_{jj}$ 's are well-defined in the new graph  $\tilde{G}$ .

707 Note that  $\kappa_{\ell d}^{\tilde{G}} = \max_{i \in [n-1]} 1/(1 - \beta_i^2) < \max_{i \in \bar{K}} 1/(1 - \beta_i^2) = \kappa_{\ell d}^G$ , for tridiagonal graph, where  
708  $\beta_i = H_{ii+1}$ , in the case where  $H_{ii} = 1$ . This is because the  $\arg \max_{i \in [n-1]} 1/(1 - \beta_i^2) \in K$ .

## 709 A.4 Additional Experiments, ablations, and details

### 710 A.4.1 Ablations

711 **Effect of band size in banded-SONew** Increasing band size in banded-SONew captures more  
712 correlation between parameters, hence should expectedly lead to better preconditioners. We confirm  
713 this through experiments on the Autoencoder benchmark where we take band size = 0 (diag-SONew),  
714 1 (tridiag-SONew), 4, and 10 in Table 3.

715 **Effect of mini-batch size** To find the effect of mini-batch size, in Table 4. We empirically compare  
716 SONew with state of the art first-order methods such as Adam and RMSProp, and second-order  
717 method Shampoo. We see that SONew performance doesn't deteriorate much when using smaller  
718 or larger batch size. First order methods on the other hand suffer significantly. We also notice that  
719 Shampoo doesn't perform better than SONew in these regimes.

Table 4: **Comparison on Autoencoder with different batch-sizes**

| Baseline \ Batch size | 100   | 1000  | 5000  | 10000 |
|-----------------------|-------|-------|-------|-------|
| RMSProp               | 55.61 | 53.33 | 58.69 | 64.91 |
| Adam                  | 55.67 | 54.39 | 58.93 | 65.37 |
| Shampoo(20)           | 53.91 | 50.70 | 53.52 | 54.90 |
| tds                   | 53.84 | 51.72 | 54.24 | 55.87 |
| bds-4                 | 53.52 | 51.35 | 53.03 | 54.89 |

720 **Effect of Numerical Stability Algorithm 3** On tridiag-SONew and banded-4-SONew, we observe  
721 that using Algorithm 3 improves training loss. We present in Table 5 results where we observed  
722 significant performance improvements.

Table 5: **bfloat16 experiments on Autoencoder benchmark with and without Algorithm 3**. We observe improvement in training loss when using Algorithm 3

| Optimizer     | Train CE loss - without Algorithm 3 | Train CE loss - with Algorithm 3 |
|---------------|-------------------------------------|----------------------------------|
| tridiag-SONew | 53.150                              | 51.936                           |
| band-4-SONew  | 51.950                              | 51.84                            |

#### 723 A.4.2 Hyperparameter search space

724 We provide the hyperparameter search space for experiments presented in Section 5. We search over  
 725  $2k$  hyperparameters for each Autoencoder experiment using a Bayesian Optimization package. The  
 726 search ranges are: first order momentum term  $\beta_1 \in [1e - 1, 0.999]$ , second order momentum term  
 727  $\beta_2 \in [1e - 1, 0.999]$ , learning rate  $\in [1e - 7, 1e - 1]$ ,  $\epsilon \in [1e - 10, 1e - 1]$ . We give the optimal  
 728 hyperparameter value for each experiment in Table 11. For ViT and GraphNetwork benchmark, we  
 729 search  $\beta_1, \beta_2 \in [0.1, 0.999]$ ,  $lr \in [1e - 5, 1e - 1]$ ,  $\epsilon \in [1e - 9, 1e - 4]$ , weight decay  $\in [1e - 5, 1.0]$ ,  
 730 learning rate warmup  $\in [2\%, 5\%, 10\%] * \text{total\_train\_steps}$ , dropout  $\in [0, 0.1]$ , label smoothing over  
 731  $\{0.0, 0.1, 0.2\}$ . We use cosine learning rate schedule. Batch size was kept = 1024, and 512 for Vision  
 732 Transformer, and GraphNetwork respectively. We sweep over 200 hyperparameters in the search  
 733 space for all the optimizers.

734 For rfdSON [36], there’s no  $\epsilon$  hyperparameter. In addition to the remaining hyperparameters, we tune  
 735  $\alpha \in \{1e - 5, 1.0\}$  (plays similar role as  $\epsilon$ ) and  $\mu_t \in [1e - 5, 0.1]$ .

736 For LLM [44] benchmark, we only tune the learning rate  $\in [1e - 2, 1e - 3, 1e - 4]$  while keeping  
 737 the rest of the hyperparams as constant. This is due to the high cost of running experiments hence  
 738 we only tune the most important hyperparameter. For Adafactor [43], we use factored=False, decay  
 739 method=adam,  $\beta_1 = 0.9$ , weight decay=1e - 3, decay factor=0.99, and gradient clipping=1.0.

#### 740 A.4.3 Additional Experiments

741 **ViT and GraphNetwork Benchmarks:** In Figure 5 we plot the training loss curves of runs  
 742 corresponding to the best validation runs in Figure 1. Furthermore, from an optimization point  
 743 of view, we plot the best train loss runs in Figure 6 got by searching over 200 hyperparameters.  
 744 We find that tridiag-SONew is 9% and 80% relatively better in ViT and GraphNetwork benchmark  
 745 respectively (Figure 6), compared to Adam (the next best baseline).

746 **Autoencoder float32 and bfloat16 experiments:** We provide curves of all the baselines and SONew  
 747 in Figure 4(a) and the corresponding numbers in Table 6 for float32 experiments.

748 To test numerical stability of SONew and compare it with other algorithm in low precision regime,  
 749 we also conduct bfloat16 experiments on the Autoencoder benchmark (Table 7). We notice that  
 750 SONew undergoes the least degradation. Tridiagonal-sparsity SONew CE loss increases by only 0.21  
 751 absolute difference (from 51.72 in float32 (6) to 51.93), whereas Shampoo and Adam incur 0.70 loss  
 752 increase. It’s worthwhile to note that SONew performs better than all first order methods while taking  
 753 similar time and linear memory, whereas while Shampoo performs marginally better, it is  $22\times$  slower  
 754 than tridiagonal-SONew. The corresponding loss curves are given in Figure 4(b).

755 **Note:** In the main paper, our reported numbers for rfdSON on Autoencoder benchmark in Table 1  
 756 for float32 experiments are erraneuous. Please consider the numbers provided in Table 6 and the  
 757 corresponding curve in Figure 4(a). Note that there’s no qualitative change in the results and none of  
 758 the claims made in the paper are affected. SONew is still significantly better than rfdSON. We also  
 759 meticulously checked all other experiments, and they do not have any errors.

#### 760 A.4.4 Convex experiments

761 As our regret bound applies to convex optimization, we compare SONew to rfdSON [36], another  
 762 recent memory-efficient second-order Newton method. We follow [36] for the experiment setup  
 763 - each dataset is split randomly in 70%/30% train and test set. Mean squared loss is used. For  
 764 tridiag-SONew, we use a total of  $2 * d$  space for  $d$  parameters. Hence, for fair comparison we show  
 765 rfdSON with  $m = 2$ . Since the code isn’t open sourced, we implemented it ourselves. In order to  
 766 show reproducibility with respect to the reported numbers in [36], we include results with  $m = 5$  as  
 767 well. We see in the Table 8 that tridiag-SONew consistently matches or outperforms rfdSON across all

Table 6: **float32 experiments on Autoencoder benchmark.** We observe that diag-SONew performs the best among all first order methods while taking similar time. tridiag and band-4 perform significantly better than first order methods while requiring similar linear space and time. Shampoo performs best but takes  $\mathcal{O}(d_1^3 + d_2^3)$  time for computing preconditioner of a linear layer of size  $d_1 \times d_2$ , whereas our methods take  $\mathcal{O}(d_1 d_2)$  time, as mentioned in Section 5.1 rfdSON takes similar space as SONew but performs considerably worse.

| Optimizer     | First Order Methods  |           |           |               |              |        |            |
|---------------|----------------------|-----------|-----------|---------------|--------------|--------|------------|
|               | SGD                  | Nesterov  | Adagrad   | Momentum      | RMSProp      | Adam   | diag-SONew |
| Train CE loss | 67.654               | 59.087    | 54.393    | 58.651        | 53.330       | 53.591 | 53.025     |
| Time(s)       | 62                   | 102       | 62        | 67            | 62           | 62     | 63         |
| Optimizer     | Second Order Methods |           |           |               |              |        |            |
|               | Shampoo(20)          | rfdSON(1) | rfdSON(4) | tridiag-SONew | band-4-SONew |        |            |
| Train CE loss | 50.702               | 53.56     | 52.97     | 51.723        | 51.357       |        |            |
| Time(s)       | 371                  | 85        | 300       | 70            | 260          |        |            |

Table 7: **bfloat16 experiments on Autoencoder benchmark** to test the numerical stability of SONew and robustness of Algorithm 3. We notice that diag-SONew degrades only marginally (0.26 absolute difference) compared to float32 performance. tridiag-SONew and band-4-SONew holds similar observations as well. Shampoo performs the best but has a considerable drop (0.70) in performance compared to float32 due to using matrix inverse, and is slower due to its cubic time complexity for computing preconditioners. Shampoo implementation uses 16-bit quantization to make it work in 16-bit setting, leading to further slowdown. Hence the running time in bfloat16 is even higher than in float32.

| Optimizer     | First Order Methods  |           |           |               |              |        |            |
|---------------|----------------------|-----------|-----------|---------------|--------------|--------|------------|
|               | SGD                  | Nesterov  | Adagrad   | Momentum      | RMSProp      | Adam   | diag-SONew |
| Train CE loss | 80.454               | 72.975    | 68.854    | 70.053        | 53.743       | 54.328 | 53.29      |
| Train time(s) | 36                   | 43        | 37        | 36            | 37           | 38     | 44         |
| Optimizer     | Second Order Methods |           |           |               |              |        |            |
|               | Shampoo(20)          | rfdSON(1) | rfdSON(4) | tridiag-SONew | band-4-SONew |        |            |
| Train CE loss | 51.401               | 57.42     | 55.53     | 51.937        | 51.84        |        |            |
| Train time(s) | 1245                 | 80        | 284       | 55            | 230          |        |            |

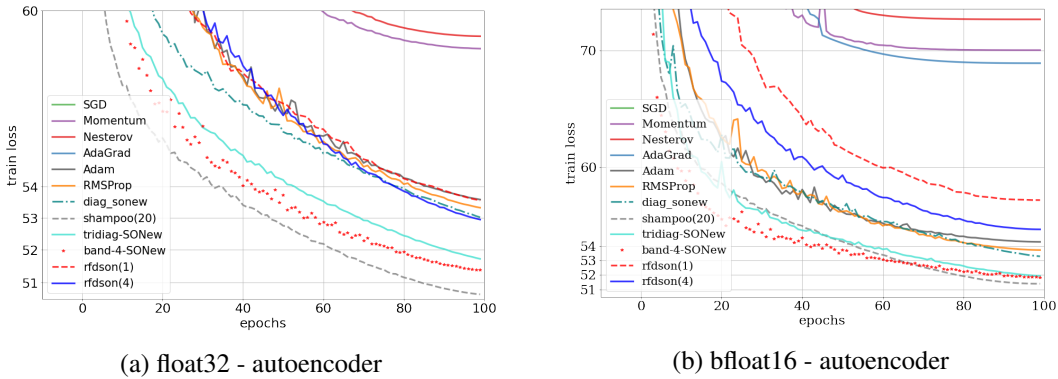

Figure 4: Training curves of all the baselines for Autoencoder benchmark (a) float32 training (b) bfloat16 training

768 3 benchmarks. Each experiment was run for 20 epochs and we report the best model's performance  
769 on test set.



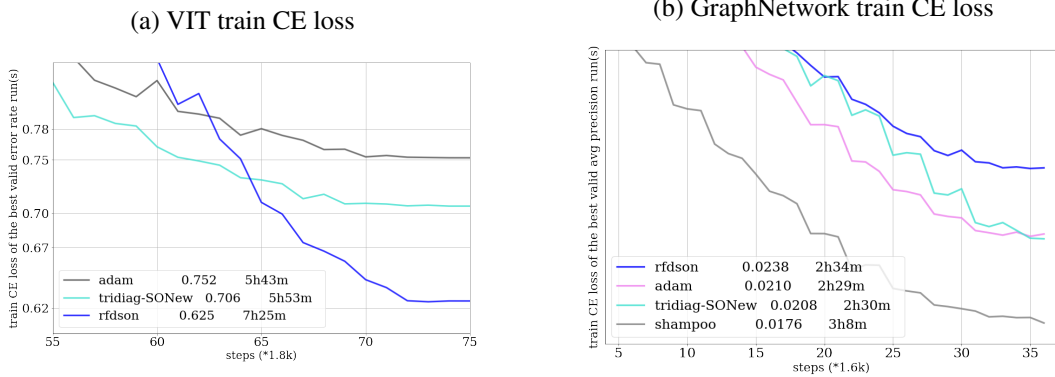

Figure 5: Train loss corresponding to the best validation runs in Figure 1 (a) VIT benchmark (b) GraphNetwork benchmark. We report the numbers and the training time in the legend. We observe that tridiag match or perform better than adam.

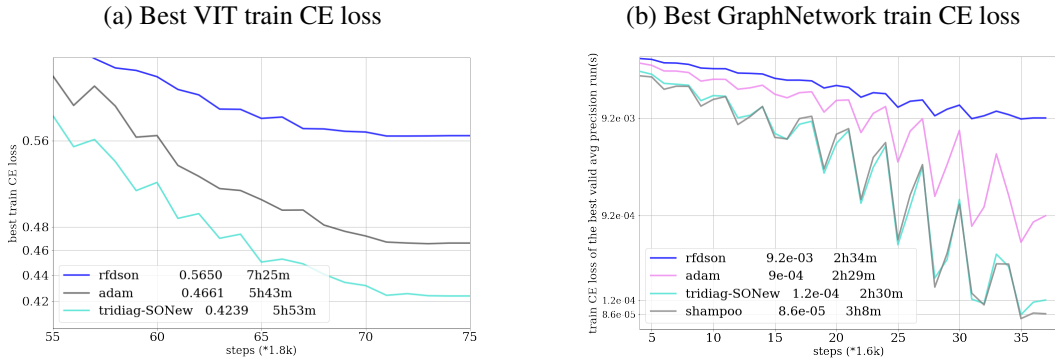

Figure 6: Best train loss achieved during hyperparam tuning. (a) VIT benchmark (b) GraphNetwork benchmark. We report the numbers and the training time in the legend. We observe that tridiag significantly outperforms adam, while being comparable to shampoo.

Table 8: Comparison of rfdSON and tridiag-SONew in convex setting on three datasets. We optimize least square loss  $\sum_t (y_t - w^T x_t)^2$  where  $w$  is the learnable parameter and  $(x_t, y_t)$  is the  $t^{\text{th}}$  training point. Reported numbers is the accuracy on the test set.

Table 9: (a) Dataset stats

| Dataset | # total points | dimension |
|---------|----------------|-----------|
| a9a     | 32,561         | 123       |
| gisette | 6000           | 5000      |
| mnist   | 11791          | 780       |

Table 10: (b) RFD-SON vs tridiag-SONew

| Dataset | RFD-SON, m=2 | RFD-SON, m=5 | tridiag-SONew |
|---------|--------------|--------------|---------------|
| a9a     | 83.3         | 83.6         | 84.6          |
| gisette | 96.1         | 96.2         | 96.6          |
| mnist   | 93.2         | 94.5         | 96.5          |



Table 11: **Optimal hyperparams for Autoencoder Benchmark**

Table 12: (a) float32 experiments optimal hyperparamters

| Baseline   | $\beta_1$ | $\beta_2$ | $\epsilon$ | lr      |
|------------|-----------|-----------|------------|---------|
| SGD        | 0.99      | 0.91      | 8.37e-9    | 1.17e-2 |
| Nesterov   | 0.914     | 0.90      | 3.88e-10   | 5.74e-3 |
| Adagrad    | 0.95      | 0.90      | 9.96e-7    | 1.82e-2 |
| Momentum   | 0.9       | 0.99      | 1e-5       | 6.89e-3 |
| RMSProp    | 0.9       | 0.9       | 1e-10      | 4.61e-4 |
| Adam       | 0.9       | 0.94      | 1.65e-6    | 3.75e-3 |
| Diag-SONew | 0.88      | 0.95      | 4.63e-6    | 1.18e-3 |
| Shampoo    | 0.9       | 0.95      | 9.6e-9     | 3.70e-3 |
| tridiag    | 0.9       | 0.96      | 1.3e-6     | 8.60e-3 |
| band-4     | 0.88      | 0.95      | 1.5e-3     | 5.53e-3 |

Table 13: (b) bfloat16 experiments optimal hyperparamters

| Baseline   | $\beta_1$ | $\beta_2$ | $\epsilon$ | lr      |
|------------|-----------|-----------|------------|---------|
| SGD        | 0.96      | 0.98      | 2.80e-2    | 1.35e-2 |
| Nesterov   | 0.914     | 0.945     | 8.48e-9    | 6.19e-3 |
| Adagrad    | 0.95      | 0.93      | 2.44e-5    | 2.53e-2 |
| Momentum   | 0.9       | 0.99      | 0.1        | 7.77e-3 |
| RMSProp    | 0.9       | 0.9       | 2.53e-10   | 4.83e-4 |
| Adam       | 0.9       | 0.94      | 3.03e-10   | 3.45e-3 |
| Diag-SONew | 0.9       | 0.95      | 4.07e-6    | 8.50e-3 |
| Shampoo    | 0.85      | 0.806     | 6.58e-4    | 5.03e-3 |
| ztridiag   | 0.83      | 0.954     | 1.78e-6    | 7.83e-3 |
| band-4     | 0.9       | 0.96      | 1.52e-6    | 4.53e-3 |
